# Generation and first characterization of TRDC-Knockout pigs lacking $\gamma\delta$ T cells

Bjoern Petersen<sup>1\*</sup>, Robert Kammerer<sup>2\*</sup>, Antje Frenzel<sup>1</sup>, Petra Hassel<sup>1</sup>, Tung Huy Dau<sup>2</sup>, Roswitha Becker<sup>1</sup>, Angele Breithaupt<sup>3</sup>, Reiner Georg Ulrich<sup>4</sup>, Andrea Lucas-Hahn<sup>1</sup> and Gregor Meyers<sup>2</sup>

<sup>1</sup>Institute of Farm Animal Genetics, Friedrich-Loeffler-Institut, Mariensee, Neustadt, Germany

<sup>2</sup>Institute of Immunology, Friedrich-Loeffler-Institut, Greifswald, Insel Riems, Germany

<sup>3</sup>Department of Experimental Animal Facilities and Biorisk Management, Friedrich-Loeffler-Institut, Greifswald, Insel Riems, Germany

<sup>4</sup>Institute for Veterinary-Pathology, Leipzig University, Leipzig, Germany

\* Authors contributed equally

Correspondence to:

Bjoern Petersen  
Institute of Farm Animal Genetics  
Friedrich-Loeffler-Institut  
Hoeltystrasse 10  
31535 Neustadt am Rbge./Mariensee,  
Germany  
[bjoern.petersen@fli.de](mailto:bjoern.petersen@fli.de)

or Robert Kammerer  
Institute of Immunology  
Friedrich-Loeffler-Institut  
Suedufer 10  
17493 Greifswald-Insel Riems,  
Germany  
[robert.kammerer@fli.de](mailto:robert.kammerer@fli.de)

AF: [antje.frenzel@fli.de](mailto:antje.frenzel@fli.de)  
PH: [petra.hassel@fli.de](mailto:petra.hassel@fli.de)  
THD: [HuyTung.Dau@fli.de](mailto:HuyTung.Dau@fli.de)  
RB: [roswitha.becker@fli.de](mailto:roswitha.becker@fli.de)  
AB: [angele.breithaupt@fli.de](mailto:angele.breithaupt@fli.de)  
RU: [reiner.ulrich@vetmed.uni-leipzig.de](mailto:reiner.ulrich@vetmed.uni-leipzig.de)  
ALH: [andrea.lucas-hahn@fli.de](mailto:andrea.lucas-hahn@fli.de)  
GM: [gregor.meyers@fli.de](mailto:gregor.meyers@fli.de)

Running title:  $\gamma\delta$  T cell knockout pigs

Keywords: TRDC-knockout,  $\gamma\delta$  T cell, TCR, Immunity, SCNT, CRISPR/Cas

1 **Abstract**

2 The TRDC-Locus encodes the T cell receptor delta constant region, one component of the  
3  $\gamma\delta$  T cell receptor which is essential for development of  $\gamma\delta$  T cells. In contrast to peptide  
4 recognition by  $\alpha\beta$  T cells, antigens activating  $\gamma\delta$  T cells are mostly MHC independent and not  
5 well characterized. Therefore, the function of  $\gamma\delta$  T cells and their contribution to protection  
6 against infections is still unclear. Higher numbers of circulating  $\gamma\delta$  T cells compared to mice,  
7 render the pig a suitable animal model to study  $\gamma\delta$  T cells. Knocking-out the porcine TRDC-  
8 locus by intracytoplasmic microinjection and somatic cell nuclear transfer resulted in healthy  
9 living  $\gamma\delta$  T cell deficient offspring. Flow cytometric analysis revealed that TRDC-KO pigs lack  
10  $\gamma\delta$  T cells in peripheral blood mononuclear cells (PBMC) and spleen cells. The composition  
11 of the remaining leucocyte subpopulations was not affected by the depletion of  $\gamma\delta$  T cells.  
12 Genome-wide transcriptome analyses in PBMC revealed a pattern of changes reflecting the  
13 impairment of known or expected  $\gamma\delta$  T cell dependent pathways. Histopathology did not  
14 reveal developmental abnormalities of secondary lymphoid tissues. However, in a  
15 vaccination experiment the KO pigs stayed healthy but had a significantly lower neutralizing  
16 antibody titer as the syngenic controls.

17

18

## 19 Introduction

20 The adaptive immune system is composed of three lymphocyte subsets, B cells, T cells  
21 expressing the  $\alpha\beta$  T cell receptor (TCR) and T cells expressing  $\gamma\delta$  TCRs. The tripartite  
22 organization of the lymphocytic immune system seems to be fundamental since it evolved  
23 independently in jawed and jawless vertebrates<sup>1</sup>. These cells generate their antigen specific  
24 receptors using somatic V(D)J recombination, which enables them to recognize a vast  
25 spectrum of different antigens. While the nature of antigen recognition by B cells and  $\alpha\beta$  T  
26 cells is well established, a unifying concept for  $\gamma\delta$  T cell antigen recognition and function is  
27 still pending. The majority of  $\gamma\delta$  T cells are activated in an MHC-independent manner, which  
28 is in striking contrast to MHC-restricted  $\alpha\beta$  T cells. They can attack target cells directly  
29 through their cytotoxic activity or indirectly through activation of other immune cells<sup>2</sup>. Until  
30 recently,  $\gamma\delta$  T cells were thought to be simply innate immune cells with limited or redundant  
31 functions<sup>3</sup>. The current view is that these cells complement many different players of the  
32 immune system<sup>4</sup>, and it is becoming obvious that they represent a heterogenous population  
33 of cells with important unique features in many infections, autoimmune diseases, allergies  
34 and in immunoregulation. A wide range of  $\gamma\delta$  T cell functions have been described in humans  
35 and mice, including skin and mucosal epithelial wound repair, induction of tolerance,  
36 cytotoxicity and the production of various cytokines that regulate immune responses<sup>5-8</sup>. The  
37 increase in  $\gamma\delta$  T cells following vaccinia virus infection, high vaccinia virus replication in  $\gamma\delta$  T  
38 cell knockout mice, and the selective lysis of  $\gamma\delta$  T cells against vaccinia virus infected target  
39 cells indicate some role for  $\gamma\delta$  T cells during virus infections<sup>9-11</sup>. To understand what they do  
40 and what role they play in different challenging situations of the immune system, a knockout  
41 animal model would be indispensable. A  $\gamma\delta$  T cell deficient mouse model was successfully  
42 established<sup>12</sup>, however  $\gamma\delta$  T cells show a remarkable degree of diversification in function,  
43 anatomical localization and TCR usage that also differs largely between species<sup>13</sup>.  
44 Therefore, care has to be taken when extrapolating results from one species to the other. In  
45 humans and mice  $\gamma\delta$  T cells constitute only 0.5–10% of T cells in peripheral blood but are  
46 substantially enriched in epithelial tissues (e.g. in skin, lungs, intestine). A prominent

47 population of  $\gamma\delta$  T cells in human blood,  $V\gamma9V\delta2$  T cells which recognize phosphoantigens  
48 (PAGs) do not exist in mice but were recently described in the new world camelid *Vicugna*  
49 *pacos* (alpaca)<sup>14</sup>. Furthermore, while in human and mice a limited number of  $\gamma\delta$  VDJ  
50 cassettes exist, species like cattle, pigs and chicken have larger numbers of  $\gamma\delta$  VDJ  
51 cassettes and a high percentage of circulating  $\gamma\delta$  T cells (20 - 50 %), thus called  $\gamma\delta$  T cell-  
52 high species in contrast to  $\gamma\delta$  T cell-low species (humans and mice)<sup>15</sup>. In addition, in some  
53 species the co-receptor WC1 family, which belong to the group B scavenger receptor  
54 cysteine-rich molecules, is expanded<sup>16</sup>. WC1 receptors are exclusively expressed by  $\gamma\delta$  T  
55 cells and function as hybrid pattern recognition receptors and  $\gamma\delta$  TCR co-receptors in cattle  
56<sup>17</sup>. Bovine WC1 receptors can directly bind to pathogenic bacteria and transduce activation  
57 signals to  $\gamma\delta$  T cells, thus,  $\gamma\delta$  T cells may be crucial for the control of certain systemic  
58 infections<sup>17</sup>. Based on the remarkable lack of conservation between  $\gamma\delta$  T cells of different  
59 species, additional animal models are needed to understand the function of  $\gamma\delta$  T cells and to  
60 establish a unifying concept for their role during immune responses. In this report we  
61 describe the generation of TRDC-KO pigs and their genetically identical wild type controls.  
62 Since the number and quality of inbred pig strains are limited, the identity at the MHC locus  
63 of the KO and control animals is of utmost importance for the comparison of the immune  
64 response to infections. We did not observe any abnormalities in health and behavior of the  
65 KO pigs under standard housing conditions. In addition, the immune system in KO pigs  
66 developed normally, with the exception of the absence of  $\gamma\delta$  T cells. The availability of a  $\gamma\delta$  T  
67 cells deficient animal model from a  $\gamma\delta$  T cell-high species may add important new insights in  
68 the role of this mysterious part of the adaptive immune system.

69

## 70 **Results**

71 **Intracytoplasmic microinjection of porcine *in vitro* derived zygotes with TRDC-**  
72 **CRISPR/Cas and transfer to recipients**

73 After transfer of 35 microinjected embryos, both recipients (#695, #696) were determined  
74 pregnant on day 25 after surgical embryo transfer. Sow 695 delivered 5 liveborn piglets on  
75 day 112 of gestation and sow 696 gave birth to 9 liveborn piglets on day 114 of gestation  
76 (Table 1). All piglets were healthy and showed no aberrations regarding birth weight  
77 compared to age-matched counterparts or wild type littermates.

#### 78 **Genotyping of TRDC-KO piglets**

79 Genomic DNA from tail tips was used for PCR-based detection of genetic modifications at  
80 the TRDC locus in the piglets. The genomic DNA of the piglets originating from  
81 intracytoplasmic microinjection of the pX330-TRDCEX4 #1 and #2 plasmids was employed  
82 for PCR (Figure 1) and subsequent sequencing (Figure 2) to detect genetic modifications at  
83 the TRDC gene. In total, two out of five piglets (40%) from sow 695 showed a biallelic 40 bp  
84 deletion within exon 4 of the TRDC gene, while four out of nine piglets (44.4%) from sow 696  
85 carried a biallelic 40 bp deletion. The remaining piglets were detected to be wild type. The  
86 overall efficiency to generate a 40 bp biallelic deletion in the exon 4 of the TRDC gene was  
87 42.9% (6/14).

#### 88 **Transfection of CRISPR/Cas9 plasmids**

89 As an alternative to the intracytoplasmic microinjection approach, we employed somatic cell  
90 nuclear transfer to produce genetically identical TRDC knockout pigs and syngeneic wild  
91 type control pigs. Therefore,  $3 \times 10^6$  cells in total were co-transfected with the plasmids  
92 pX330-TRDCEX4#1 and #2 and subsequently seeded on three T25 flasks (25 cm<sup>2</sup>). After  
93 reaching 70-80 % confluency, cells were detached by EDTA/Trypsin treatment and seeded  
94 at a concentration of 7-10 cells per well on a 96-well plate. Individual cell clones were  
95 analyzed by PCR. Cells with a biallelic deletion of the TRDC gene (- 40 bp) showed only the  
96 lower band, while cell cultures with a mixed population of wild type, monoallelic and biallelic  
97 genetically modified cells showed an upper wild type band at 499 bp and a lower band at 459  
98 bp (Figure 3). Cell clones D12 (mixture) and H2 (almost pure lower band) were chosen as

99 donor cells for SCNT. D12 was chosen to produce both TRDC knockout and syngeneic wild  
100 type control pigs.

### 101 **Somatic cell nuclear transfer of TRDC-KO embryos and syngeneic controls**

102 H2-derived cloned embryos were surgically transferred to two hormonally synchronized  
103 recipients. Each of the two recipients (#8106 and #738) received 90 cloned embryos and  
104 were detected to be pregnant on day 25 after embryo transfer. D12-derived cloned embryos  
105 were also transferred to two recipients. One recipient (#8115) received 97 embryos, while the  
106 second one received 96 embryos (#737). Again, both recipients were determined to be  
107 pregnant by ultrasound scanning on day 25 after embryo transfer (Table 2). All recipients  
108 were allowed to go to term and delivered in total 9 healthy liveborn (9/17:52.9%) and 8  
109 stillborn piglets (8/17:47.1%). The stillborn piglets did not show any abnormalities but were  
110 not checked for deletions in the exon 4 of the TRDC gene.

111 PCR analysis of the cloned piglets revealed that 4 out of the 7 piglets (57.1%) originating  
112 from the mixed cell clone D12 (737-1-7) carried a biallelic 40 bp deletion of the TRDC gene,  
113 while the remaining 3 piglets remained wild type (42.9%). The two piglets (738-1, -2)  
114 originating from cell clone H2 carried a biallelic 40 bp deletion of the TRDC gene, as  
115 expected (Figure 4).

### 116 **Fitness and viability of TRDC-knockout pigs**

117 The TRDC knockout pigs did not differ to syngenic wild type control animals and age-  
118 matched wild type pigs in our facility in regard of their health status and growing performance  
119 (Figure 5). TRDC-KO pigs are kept for 2 years in our facility under standard conditions and  
120 never showed any health impairment.

### 121 **FACS analysis of TRDC-knockout blood and spleen cells**

122 To determine the effect of the 40 bp deletion in the TRDC gene on lymphocyte composition  
123 in TRDC-KO pigs we performed flow cytometry analysis of PBMC and spleen cells from 8 wt  
124 pigs and 5 TRDC-KO pigs. We used two mAb that specifically detect independent antigens  
125 of porcine  $\gamma\delta$  T cells. One binds to the  $\delta$ -chain of the T cell receptor and the other to the CD3

126 antigen of  $\gamma\delta$  T cells. In average 20 % (ranging from 8 % – 47 %) of peripheral blood T cells  
127 were double-stained by these mAbs in wild type pigs while no double-stained cells were  
128 detected in TRDC-KO pigs, indicating that no  $\gamma\delta$  T cells were present in peripheral blood of  
129 TRDC-KO pigs (Figure 6A). In addition, we isolated spleen cells from wild type and TRDC-  
130 KO pigs and analyzed the content of  $\gamma\delta$  T cell populations. Typically, in wild type pigs the  
131 majority (80 %) of  $\gamma\delta$  T cells in the blood belong to the CD2 negative phenotype, while in the  
132 spleen the majority (66 %) of  $\gamma\delta$  T cells are CD2 positive. No  $\gamma\delta$ CD3 positive cells of either  
133 type were detected in the spleen of TRDC-KO pigs (Figure 6B). These data indicate that no  
134  $\gamma\delta$  T cells developed in TRCD-KO pigs. The majority of  $\gamma\delta$  T cells in pigs are CD4 and CD8  
135 negative, reflected by minimal numbers of CD4/CD8 double negative T cells in TRCD-KO  
136 pigs (Figure 6C). Comparing the numbers of various lymphocyte subpopulations between  
137 TRDC-KO pigs and wild type pigs we did not find significant differences (Figure 6D). These  
138 results indicated that the absence of  $\gamma\delta$  T cells had no major impact on the development of  
139 other lymphocyte populations.

#### 140 **Comparison of gene expression profiles of TRDC-KO versus control animals via** 141 **microarray analysis**

142 Since we did not detect a major influence on the composition of lymphocyte subpopulations  
143 in the peripheral blood by the complete loss of  $\gamma\delta$  T cells, we asked whether the absence of  
144  $\gamma\delta$  T cells has an impact on the transcriptional profile of the remaining lymphocyte  
145 population. Thus, we performed microarray analysis of PBMC isolated from wild type pigs  
146 and TRDC-KO pigs. Only 0.7 % of genes were regulated more than 2-fold (0.4 %  
147 upregulated and 0.3 % downregulated) in PBMC of TRDC-KO pigs (Figure 7A). Hierarchical  
148 clustering identified gene clusters with a significant expression level in either the wild type or  
149 the TRDC-KO pigs, only these genes were further analyzed (Figure 7B). A high portion of  
150 down-regulated genes are known to be preferentially expressed by  $\gamma\delta$  T cells, such as  $\delta$  T  
151 cell receptor genes, GATA3, WC1.1, SOX13, IL-1R and IL-18R. Genes which were  
152 upregulated in TRDC-KO pigs encompass genes which are preferentially expressed by  
153 granulocytes and monocytes in human PBMC like Zyxin, CXCL8 and CXCL2. Thus, the

154 transcriptional profile of PBMC in TRDC-KO pigs reflect the loss of  $\gamma\delta$  T cells and as a result  
155 the proportional increase of non-lymphoid cells.

156 **No differences between wild type and TRDC-KO pigs were detected by gross**  
157 **pathological, histological and immunohistological examination of lymphoid tissues**

158 We wondered if the development of lymphoid tissues was influenced by the absence of  $\gamma\delta$  T  
159 cells. At autopsy the size and morphology of all lymphoid tissues did not differ between wild-  
160 type or knockout pigs. Further, neither the detailed histopathologic evaluation on H&E  
161 stained slides nor the application of T-cell (CD3) and B-cell (CD20) markers revealed  
162 differences in the overall architecture, distribution and quantity of the immune cells labelled.  
163 Representative slides of the thymus, ileal Peyer's patches and tonsil are shown in Figure 8  
164 (A-R). Both mAbs directed against the specific  $\gamma\delta$  T cell-antigens (PGBL22A, PPT16 ) cross  
165 react on tissue slides with cytoplasmic structures of an unknown cell type, resulting in  
166 unspecific reactions. Thus both antibodies we had at hand, were unfortunately not suited for  
167 the use in immunohistology on cryosections.

168 **Possible role of  $\gamma\delta$  T cells in vaccine-mediated protection**

169 As a first approach towards testing the immunological competence of the TRDC-KO pigs we  
170 decided to vaccinate the animals with a commercial vaccine against the pestivirus classical  
171 swine fever virus (CSFV). The vaccine contains a highly attenuated live virus of the so-called  
172 C-strain type. In normal pigs, the vaccine is known to be completely apathogenic but very  
173 effective with regard to induction of a protective immunity against CSFV field virus infection<sup>18-</sup>  
174 <sup>21</sup>. Three knockout pigs [group 1, numbers 1314, 1318, 1319] and two syngenic wild type  
175 controls [group 2, numbers 1315, 1320] were vaccinated at day 0 with the commercial live  
176 virus vaccine via the intramuscular route as recommended by the supplier. Rectal  
177 temperature of the animals was recorded daily starting 10 days before vaccination. The  
178 animals were monitored daily for general health status. Neither in group 1 nor 2 any signs of  
179 disease were detected during the observation period. Body temperatures of all animals  
180 remained in the normal range. Blood for serum production was taken on day 0 and on day 21



181 p.i. The sera were tested for the presence of neutralizing antibodies against the homologous  
182 CSFV C-strain. As expected, the results were negative for all animals at day 0, proving that  
183 they had not had any contact to CSFV antigens before. In contrast, neutralization titers were  
184 recorded on day 21 for all animals (Figure 9). The values were significantly higher for the wild  
185 type pigs compared to TRDC-KO (P value = 0.0428).

## 186 Discussion

187 Mice deficient for  $\gamma\delta$  T cells have been established almost 30 years ago<sup>22</sup>. In the meantime,  
188 they have proven to be extraordinary helpful to elucidate functions of  $\gamma\delta$  T cells. In particular,  
189 the role and contribution of certain murine  $\gamma\delta$  T cell compartments during infections with viral,  
190 bacterial and parasitic pathogens could be defined using these mice<sup>23-25</sup>. Taken into account  
191 that  $\gamma\delta$  T cell populations can differ largely between species it is of considerable importance  
192 to have  $\gamma\delta$  T deficient animals from additional species. One major variation of  $\gamma\delta$  T cell  
193 compartments between species is the amount of circulating  $\gamma\delta$  T cells. The proportion of  
194 circulating  $\gamma\delta$  T cells is surprisingly high in artiodactyls (e.g. cattle, sheep and pigs) and  
195 chicken<sup>15</sup>. Thus, the animal model described in the present report is the first of a  $\gamma\delta$  T cell-  
196 high species. Pigs with a biallelic knockout of the TRDC gene were efficiently produced  
197 either by intracytoplasmic microinjection or somatic cell nuclear transfer using modified cells  
198 as donor cells. While healthy offspring could be obtained after embryo transfer of  
199 microinjected zygotes, somatic cell nuclear transfer (SCNT) resulted in 47.1 % stillborn  
200 piglets. As healthy TRDC knockout piglets were obtained by both techniques, we conclude  
201 that the relatively high number of stillborn piglets was associated with SCNT and false or  
202 incomplete reprogramming of the donor cell nucleus<sup>26-28</sup>. TRDC knockout pigs developed  
203 normally and reached sexual maturity. After breeding TRDC deficient pigs, all offspring  
204 carried a monoallelic knockout of the TRDC gene as expected. Though mosaicism cannot be  
205 excluded in the pigs originating from intracytoplasmic microinjection<sup>29</sup>, we found the 40 bp  
206 deletion in all tissues analyzed (skin, heart, liver, kidney, muscle), rendering mosaicism  
207 unlikely. Besides, no off-target events could be detected in the 10 most possible genomic  
208 sites in microinjected and cloned offspring (data not shown). As previously observed in

209 Tcrd-/- mice no  $\gamma\delta$  T cells remain in the TRDC-KO pigs while the studies suggest the  
210 presence of a normal  $\alpha\beta$  T cell repertoire in the periphery of the  $\gamma\delta$  T cell deficient pigs<sup>22</sup>.  
211 Furthermore, microarray analysis did not indicate that there is a major impact on the  
212 transcriptome of PBMC by the loss of  $\gamma\delta$  T cells. These observations may explain why the  
213 immune phenotype of TRDC-KO pigs is surprisingly mild. The vaccination experiment  
214 described above was conducted with a commercial vaccine containing a live virus that is  
215 known to be completely apathogenic in wild type pigs<sup>18-21</sup>. We have chosen this approach to  
216 check whether the knockout pigs are hampered in a way that they cannot control a virus  
217 infection at all, even when the infecting virus is highly attenuated. In fact, we saw no signs of  
218 disease in the vaccinated pigs which could be explained in different ways, namely that the so  
219 far unknown attenuation principle of CSFV C-strain is sufficient even in immunologically  
220 compromised animals, that the loss of  $\gamma\delta$  T cells has only mild effects on virus control by the  
221 immune system or a mixture of both reasons. The results of the antibody neutralization test  
222 showed that the knockout pigs were able to mount a measurable antibody response to an  
223 infecting virus, but the titers were lower than in the wild type animals. Even though the  
224 statistical significance of this result is only low due to the small number of animals tested, it  
225 represents a first indication for a reduced immunological competence of the knockout  
226 animals. This may indicate that different outcomes of infections are due to the missing  
227 contribution of  $\gamma\delta$  T cells during the immune response not to other deficiencies of the immune  
228 system. This point will have to be followed up using different infection and challenge  
229 systems. There are various reports pointing to a protective role of  $\gamma\delta$  T cells against  
230 important pig pathogens such as African swine fever virus<sup>30,31</sup>, Foot and mouth disease  
231 virus<sup>32,33</sup>, *Mycobacterium bovis*<sup>34</sup>, Porcine respiratory and reproductive syndrome virus<sup>35,36</sup>,  
232 and Influenza A virus<sup>37</sup>. A specific role of  $\gamma\delta$  T cells has not been definitively proven so far,  
233 but with the TRDC-KO pigs at hand, the large variety of swine pathogens displaying different  
234 ways of pathogenesis and interplay with the hosts immune system can be tested to finally  
235 elucidate the role of  $\gamma\delta$  T cells in immunological defense against infectious agents. The fact

236 that some of these pathogens are zoonotic and responsible for severe human diseases  
237 render this approach even more attractive.

## 238 **Material and Methods**

### 239 **Animals**

240 German Landrace pigs served as recipient animals for genetically modified embryos  
241 derived by somatic cell nuclear transfer (SCNT).

### 242 **CRISPR/Cas vector and single-guide RNA**

243 The CRISPR/Cas9 system was used to induce defined deletions within the exon 4 of the  
244 porcine TRDC gene (Ensembl transcript: ENSSSCT00000026772). Guide RNAs (gRNAs)  
245 were designed using the web-based design tool *CRISPOR* (<http://crispor.tefor.net/>) (Fig. X).  
246 Target sequences were analyzed via BLAST to reduce the probability for off-target events.  
247 Two oligo duplexes including the target sequence (TRDCEX4#1: 5' -CAC CGT GAT GTC  
248 TGT CAC AGT GCT T-3' and TRDCEX4#2: 5'-CAC CGG CAG TCA AGA GAA AAT TGA-  
249 3') and BbsI overhangs were designed, and each gRNA was cloned into a linearized  
250 CRISPR/Cas9 vector pX330-U6-Chimeric\_BB-CBh-hSpCas9 (Addgene plasmid # 42230)<sup>38</sup>.  
251 The final plasmids pX330-TRDCEX4#1 and pX330-TRDCEX4#2 were then used for  
252 intracytoplasmic microinjection into IVF zygotes and for transfecting porcine fetal fibroblasts.

### 253 **Culture and lysis of primary cell cultures from wild type fetuses**

254 Porcine fibroblasts were isolated from ear tissue of wild type piglets and cultured in  
255 Dulbecco's modified Eagle's medium (DMEM) with 2 % penicillin/streptomycin, 1 % non-  
256 essential amino acids and sodium pyruvate and 30 % fetal calf serum (FCS) (Gibco, 10270-  
257 106). After the first passage the antibiotic concentration was reduced to 1%.

### 258 **Transfection of CRISPR/Cas9 plasmids**

259 In total,  $3 \times 10^6$  cells were transfected when they reached 70-80% confluency. The two  
260 CRISPR/Cas9 plasmids (pX330-TRDCEX4#1+2) were co-transfected (at a final  
261 concentration of 5  $\mu\text{g}/\mu\text{l}$ ) into porcine fibroblasts by electroporation (Neon<sup>TM</sup> Transfection

262 System, ThermoFisher Scientific) to test the efficacy of the plasmids to induce a 40bp  
263 deletion at the targeted locus (Figure X). Electroporation conditions were as follows: 1350 V,  
264 20 mm, and two pulses. After lysis of transfected cells in cell lysis buffer followed by ethanol  
265 extraction, the DNA was analyzed using TRDC specific primer (TRDCEx4-2F: 5'-  
266 CTGGGTGTAAGTAGCAGCCT-3' and TRDCEx4-2R: 5'-ACACGAGTTTTGAGTCTGGC-3').  
267 The purified 499bp PCR product (10 ng/μl) (Invisorb® Fragment CleanUp – Startec) was  
268 Sanger sequenced to detect mutations at the target site. To produce TRDC-KO cell clones  
269 for serving as donor cells in SCNT, cells were trypsinized and subsequently diluted to a final  
270 concentration of 7-10 cells per well.

#### 271 **In-Vitro-Fertilization and In-Vitro-Maturation.**

272 In-vitro-maturation of porcine oocytes was performed as previously described<sup>39</sup>. Briefly,  
273 porcine oocytes were collected from ovaries derived from slaughterhouse and matured for 40  
274 hours in FLI medium. For in vitro fertilization, frozen boar semen from a fertile landrace boar  
275 was thawed for 30 seconds in a water bath (37 °C). The sperm motility was microscopically  
276 checked (Olympus, BH-2). After washing with Androhep® Plus (Minitube) and centrifugation  
277 for 6 minutes at 600 g, approx. 75 to 100 sperm per oocyte (depending on semen capacity)  
278 were used for fertilization (no sexed sperm were utilized for fertilization). After four hours of  
279 co-incubation, the fertilized oocytes were cultured in porcine-zygote-medium (PZM-3  
280 medium).

#### 281 **Intracytoplasmic Microinjection**

282 Plasmids were prepared in 10 mM Tris-HCl pH 7.6 and 0.25 mM EDTA pH 8.0, and  
283 backfilled in glass injection capillaries and diluted to a final concentration of 2.5 ng/μl.  
284 Individual zygotes were fixed by suction to a holding pipette. The plasmids pX330-  
285 TRDCEX4#1 and pX330-TRDCEX4#2 were intracytoplasmically co-injected into IVF-  
286 produced zygotes derived from oocytes collected from slaughterhouse ovaries 20 hours after  
287 fertilization. To this end, approx. 10 pl plasmid solution was injected with a pressure of 600  
288 hPa into IVF-produced zygotes (FemtoJet, Eppendorf). The injected zygotes were cultured in

289 PZM-3 medium at 39 °C, 5 % CO<sub>2</sub> and 5 % O<sub>2</sub>. At day 5, when embryos had reached the  
290 morula/blastocyst stage, 35 embryos were surgically transferred into each of the two  
291 recipients.

## 292 **Somatic cell nuclear transfer**

293 SCNT was performed as previously described<sup>40</sup>. Fetal fibroblasts transfected with px330-  
294 TRDCEx4#1 and px330-TRDC-Ex4#2 targeting the exon 4 of the porcine TRDC gene were  
295 used as donor cells. In order to produce syngeneic wild type control pigs simultaneously, we  
296 chose cell clone D12 that gave two bands with a 50:50 ration on the PCR gel (Fig. 3) and cell  
297 clone H2 that gave an almost clean -40bp PCR band. In total, 90 H2-derived one- to two-cell  
298 embryos were surgically transferred into each of two hormonally synchronized German  
299 Landrace gilts (7 to 9-months old). For D12-derived embryos, 97 and 96 one- to two-cell  
300 embryos were surgically transferred into two hormonally synchronized German Landrace  
301 gilts mg/day/gilt Altrenogest (Regumate® 4mg/ml, MSD Germany) for 12 days, followed by  
302 an injection of 1,000 IU PMSG (pregnant mare serum gonadotropin, Pregmagon®, IDT  
303 Biologika) on day 13 and induction of ovulation by intramuscular injection of 500 IU hCG  
304 (human chorion gonadotropin, Ovogest®300, MSD Germany) 72 h after PMSG  
305 administration. The surgical embryo transfer was performed the day after the hCG  
306 administration.

## 307 **Genotyping of transfected cells and TRDC-KO pigs**

308 Genomic DNA of the pigs was extracted from tail tips. Transfected cells and tail tips were  
309 lysed in cell lysis buffer (10%SDS, Proteinase K (20mg/ml), 10xPCR Buffer, aqua dest.) and  
310 purified by ethanol extraction. The DNA concentration was determined using the NanoDrop™  
311 (Kikser-Biotech) system. For genotyping the pigs, polymerase chain reaction (PCR) was  
312 employed using specific primers (TRDCEx4-2F: 5'-CTGGGTGTAAGTAGCAGCCT-3' and  
313 TRDCEx4-2R: 5'-ACACGAGTTTTGAGTCTGGC-3') flanking a 499 bp segment of the TRDC  
314 gene (Fig. X). PCR amplification was performed in a total volume of 50 µl: 20 ng DNA, 0.6  
315 µM reverse and forward primer, 1.5 mM MgCl<sub>2</sub>, 0.2 mM dNTPs and 1.25 U *Taq* Polymerase.

316 Cycling conditions were as follows: 32 cycles with denaturation at 94°C for 30 sec, annealing  
317 at 60 °C for 45 sec, extension at 72°C for 30 sec and a final extension at 72°C for 5 minutes.  
318 The standard conditions for gel electrophoresis were set up to 80 V, 400 mA and 60 min  
319 using a 1 % agarose gel. The PCR-product was purified (Invisorb®Fragment CleanUp-Kit,  
320 Startec) and Sanger sequenced.

### 321 **Allele-specific sequencing of the TRDC gene of cloned piglets**

322 The PCR product of the targeted region within exon 4 of the TRDC gene was subcloned into  
323 the pGEM-T Easy Vector system (Promega, Germany) in accordance with the  
324 manufacturer’s protocol and then transformed into XL10 bacteria. Bacteria were plated on  
325 Ampicillin containing Agar dishes (100 µg/ml) and allowed to grow for 16 hours. For each  
326 piglet, six colonies were picked and sequenced by using the T7prom primer.

### 327 **FACS analysis of TRDC-knockout blood and spleen cells**

328 PBMC were isolated by density gradient centrifugation using Lympholyte®-Mammal Cell  
329 Separation Media (Cedarlane, Canada). Spleen cells were isolated by generation of a single  
330 cell suspension and erythrocyte lysis with ammonium chloride. For flow cytometry  $1 \times 10^5$  cells  
331 were incubated with primary antibodies followed by an incubation with secondary antibodies.  
332 The following primary antibodies were used anti-TCRγδ (PGBL22A, IgG1; PPT16, IgG2b),  
333 anti-CD2 (MSA4, IgG2a), anti-CD3 (PPT3, IgG1), anti-CD4 (74-12-4, IgG2b) and anti-CD8  
334 (11/295/33, IgG2a). Detection of binding primary antibodies was performed using anti-mouse  
335 IgG1-PE, anti-mouse IgG2a-FITC, anti-mouse IgG2b-APC. All incubations were done in acid  
336 buffer at 4°C and dead cells were excluded by adding propidium iodide (PI) (dilution 1:1000  
337 in acid buffer) to the cells before measurement. Flow cytometry was performed with the  
338 MACSQuant Analyser and the “MACS Quantify” software.

### 339 **Transcriptome analysis**

340 RNA from isolated PBMC was extracted using TRIzol® Reagent (Thermo Fisher Scientific).  
341 RNA from 4 TRDC-knockout pigs and 2 wild type pig were pooled, respectively. Pools were

342 used to assess the quality of the RNA using an agilent bioanalyser. Labeled fragmented  
343 single-stranded cDNAs (ss-cDNA) were synthesized by using purified total RNA (100–  
344 500 ng) as template following Affymetrix WT PLUS Labeling Assay protocols. Porcine Gene  
345 1.1 ST Arrays (Affymetrix, Santa Clara, CA, USA) were hybridized to the biotinylated ss-  
346 cDNA targets. After 20 h of hybridization at 48 °C, arrays were washed by a fluidics station  
347 and then scanned by an imaging station in a GeneAtlas System (Affymetrix, Santa Clara,  
348 CA, USA). After scanning, the intensity data (CEL files) of Porcine Gene 1.1 ST arrays  
349 (Affymetrix) were extracted from the image data (DAT files) by the Affymetrix Command  
350 Console Software Version 1.4, and then normalized and analyzed by the Affymetrix  
351 Transcriptome Analysis Console (TAC) Software 4.0 for gene expression profiles and DEGs.  
352 The DEGs were selected by a cutoff of fold change >2.

### 353 **Autopsy, Histology and immune fluorescence**

354 Full autopsy was performed on all pigs. Samples of the thymus, tonsil, spleen, femoral bone  
355 marrow, ileal Peyer's patches, and lymph nodes (mandibular, tracheobronchial, cecal,  
356 popliteal) were immersion-fixed in neutral buffered, 10% formalin for at least 72 hours, and  
357 additional samples were snap frozen in liquid nitrogen.  
358 Formalin-fixed tissues were trimmed, embedded in paraffin, cut in 2 µm sections and stained  
359 with hematoxylin and eosin (H&E) according to standardized procedures. For  
360 immunohistochemistry (IHC), consecutive slides were mounted on adhesive glass slides,  
361 dewaxed in xylene, followed by rehydration in descending graded alcohols. Endogenous  
362 peroxidase was quenched with 3% H<sub>2</sub>O<sub>2</sub> in distilled water for 10 minutes at room  
363 temperature (RT). Heat induced antigen retrieval was performed in a decloaking chamber for  
364 10 minutes at 110°C in 10mM citrate buffer (pH 6). Nonspecific antibody binding was blocked  
365 with 1:2 diluted goat normal serum in Tris-buffered saline (TBS) for 30 minutes at RT. A  
366 polyclonal rabbit anti-CD3 (#A0452, diluted 1:100 in TBS, Dako Agilent, Santa Clara, CA,  
367 USA) or rabbit anti-CD20 (#RB-9013-P1, diluted 1:200 in TBS, Thermo Fisher Scientific,  
368 Waltham, MA, USA) was applied over night at 4°C. A secondary biotinylated goat-anti rabbit  
369 antibody was used (#BA-1000, diluted 1:200 in TBS, Vector Laboratories, Burlingame, CA,

370 USA) for 30 minutes at RT. The red-brown antigen labelling was developed by application of  
371 avidin-biotin-peroxidase complex (ABC) solution (Vectastain ABC Kit, #PK 6100, Vector  
372 Laboratories), followed by exposure to 3-amino-9-ethylcarbazole substrate (AEC, Dako,  
373 Agilent, Santa Clara, CA, USA). Sections were counter-stained with Mayer's hematoxylin,  
374 dehydrated in ascending graded alcohols, cleared in xylene, and coverslipped. All slides  
375 were digitized using the Aperio CS2 slide scanner (Leica Biosystems Imaging Inc., CA, USA)  
376 and image files were generated using the NDP.view2 Software (Hamamatsu Photonics,  
377 Hamamatsu City, Japan). The establishment of immunofluorescence double-labelling using a  
378 polyclonal rabbit anti-CD3 and a monoclonal mouse anti-TCR $\gamma\delta$ /PGBL22A antibody on snap  
379 frozen lymphoid tissues failed (not details shown). All examinations were performed by a  
380 board-certified pathologist (DipIECVP).

### 381 **Vaccination experiment**

382 Five pigs at an age of 3 months were included in a vaccination study. Three of these animals  
383 had a  $\gamma\delta$  knockout phenotype (numbers 1314, 1318, 1319 (738-1, 737-4, 737-5) = group 1]  
384 and two represented syngenic wild type controls [group 2, numbers 1315, 1320 (737-1, 737-  
385 6)]. The two groups were kept in separate rooms. Vaccination was done after 14 days of  
386 acclimatization with a commercial life CSFV vaccine (Pestiffa CL, Boehringer Ingelheim  
387 Vetmedica, Ingelheim, Germany) according to the providers' recommendation via the  
388 intramuscular route into the muscle brachiocephalicus. After vaccination, the animals were  
389 monitored daily. Rectal temperatures were recorded daily from -10 dpv to 24 dpv. Blood  
390 samples for serum production were taken on days 0 dpv and 21 dpv. Determination of  
391 neutralizing antibody levels was done as essentially as described before<sup>41,42</sup>

### 392 **Declarations**

### 393 **Ethics approval and consent to participate**

394 Animal experiments were approved by the supervisory authorities (LAVES, AZ 33.19-42502-  
395 04-17/2532 and LALLF, 7221.3-2-042/17) and conducted in compliance with the German  
396 animal welfare law, the German guidelines for animal welfare and the EU Directive



397 2010/63/EU. All experiments were performed in accordance with relevant guidelines and  
398 regulations.

#### 399 **Consent for publication**

400 Not applicable.

#### 401 **Availability of data and materials**

402 Not applicable

#### 403 **Competing interests**

404 The authors declare that they have no financial and non-financial competing interests.

#### 405 **Funding**

406 This study was supported by DFG (HE 6249/4-1) to R.K. This funding source had no role in  
407 the design of the study and collection, analysis, and interpretation of data and in writing the  
408 manuscript.

#### 409 **Authors' Contributions**

410 B.P., R.K. and G.M. conceived and designed the study and carried out data analysis as well  
411 as writing and revising the manuscript. B.P., A.F., P.H., R.B. and A.L.-H. established the  
412 TRDC-KO pigs, T.H.D., A.B. and R.G.U. performed experiments and data analysis.

#### 413 **Acknowledgements**

414 We thank Julia Sehl for the support with the autopsy and Gaby Stooß, Franziska Grenkowitz,  
415 Freja Pfirske, Gabriele Czerwinski and Maren Ziegler for excellent technical assistance.

416

#### 417 **Figures**

418

419

420

421

422

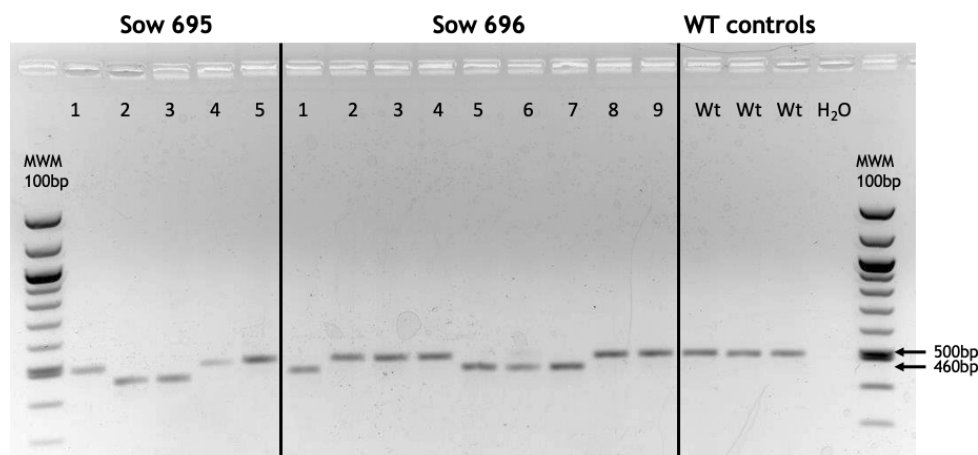

423

424

425

426 **Figure 1: PCR-Analysis of the porcine TRDC locus in samples from pigs generated by**  
 427 **intracytoplasmic microinjection.** Pigs 695-2, -3 and 696-1, -5, -6, -7 display a lower band  
 428 of about 460 bp in contrast to wild type pigs (500 bp) indicating a 40 bp deletion caused  
 429 application of the CRISPR/Cas9 construct.

430

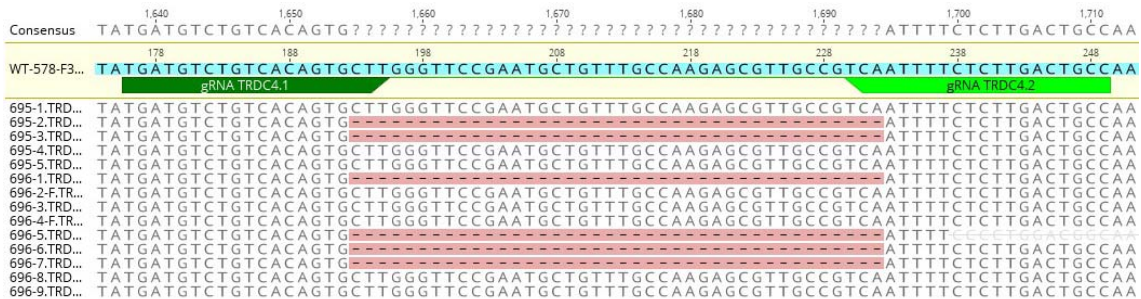

431

432 **Figure 2: Sequencing data of pigs generated by intracytoplasmic microinjection of the**  
 433 **CRISPR/Cas9 construct targeting the porcine TRDC-locus.** Sequencing results confirmed  
 434 the PCR results (Fig.1) that pigs 695-2, -3 and pigs 696-1, -5, -6, -7 carry a homozygous  
 435 knockout of the TRDC locus consisting of a clear 40 bp deletion. For each piglet, six samples  
 436 were sequenced. None of the piglets were monoallelic knockouts. (The binding sequences of  
 437 the guide RNAs are indicated by green arrows).

438

439

440

441

442

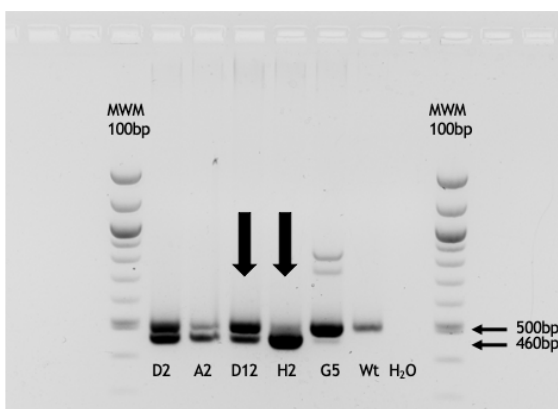

443

444

445 **Figure 3: PCR analysis of the TRDC locus of CRISPR/Cas9 transfected cells.** The lower  
446 band of 460bp indicates a 40bp deletion caused by the CRISPR/Cas9 construct. Cell clone  
447 D12 displayed two bands of 500 and 460bp of size which indicates a mixed population of  
448 cells consisting of TRDC-knockout cells, wild type cells and/or cells with a monoallelic  
449 knockout of the TRDC locus. In contrast, cell clone H2 shows a single band of 460 bp  
450 indicating an almost pure population of TRDC knockout cells.

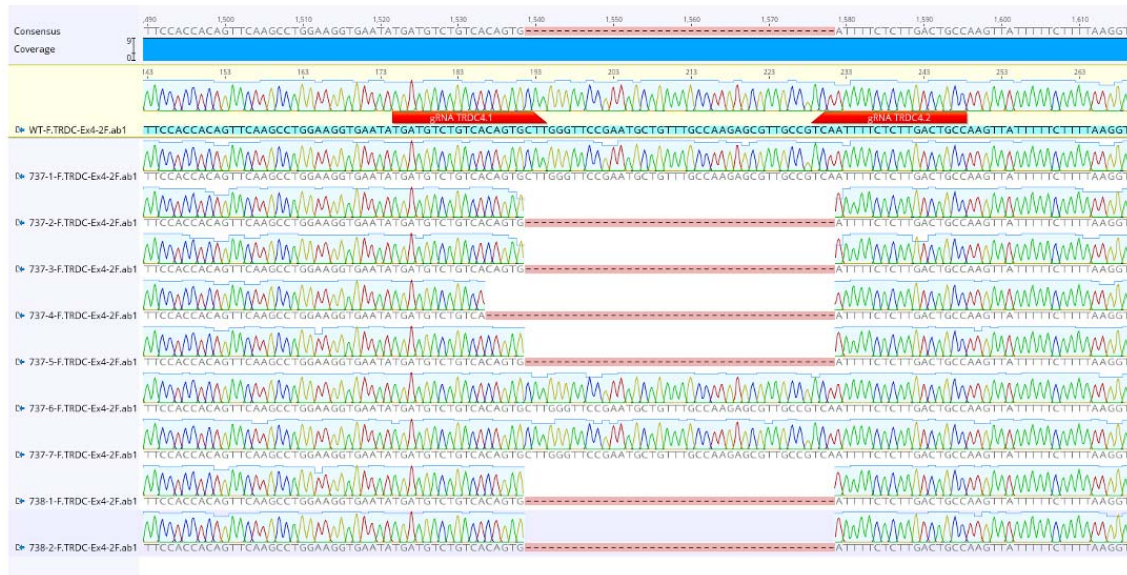

451

452 **Figure 4: Sequencing results of the cloned liveborn TRDC knockout pigs.** Pig 737-4 differed  
453 regarding the genetic modification compared to the other TRDC knockout pigs with a larger  
454 deletion encompassing 45bp, indicating its origin from a separate cell subclone. The binding  
455 sequences of the guide RNAs are indicated by red arrows.

456

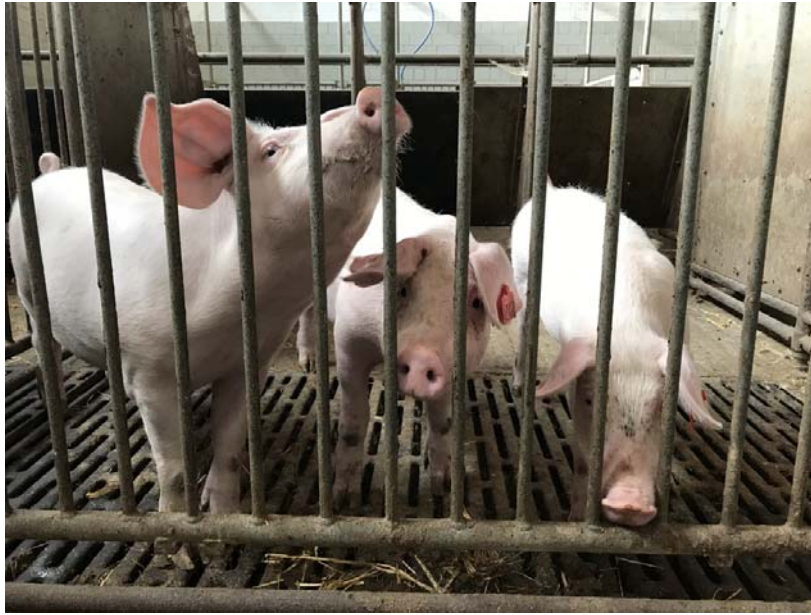

457

458 **Figure 5:** Three TRDC-knockout pigs from intracytoplasmic microinjection.

459

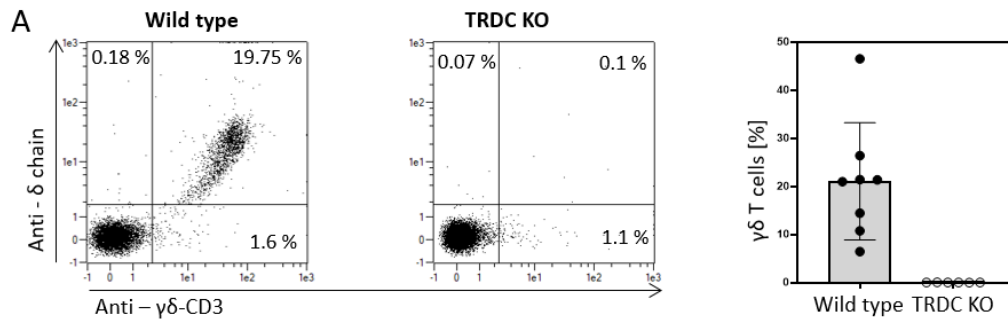

463

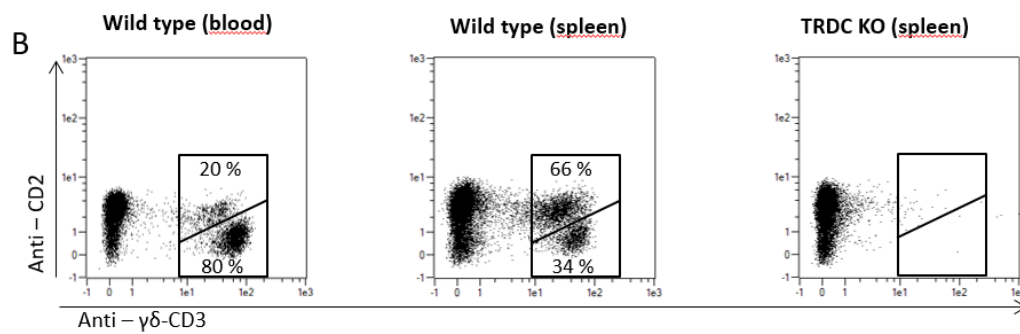

467

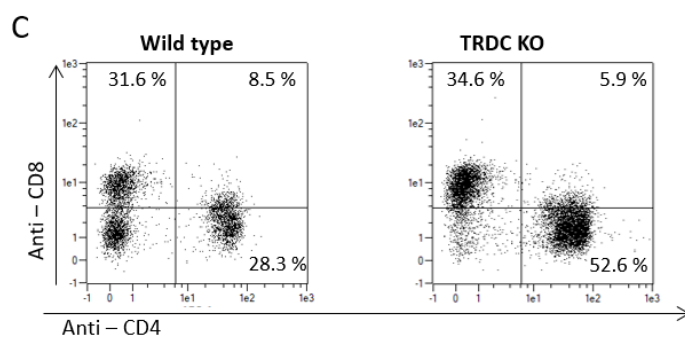

471

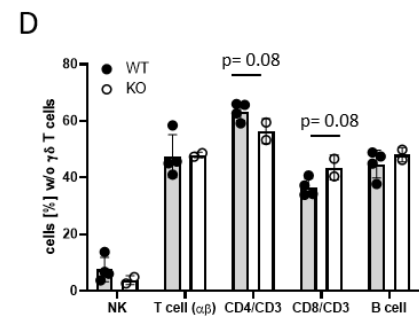

472 **Figure 6: No  $\gamma\delta$  T cells are present in blood and spleen of TRDC-Knockout pigs. (A)**  
 473 PBMC of TRDC-Knockout and wild type pigs were stained with anti-CD3, anti- $\delta$  chain and  
 474 anti-  $\gamma\delta$  T cell-specific CD3 mABs. CD3 positive cells were gated and  $\delta$  chain vs.  $\gamma\delta$  T cell-  
 475 specific CD3 dotblots are displayed. About 20% of peripheral blood T cells were  $\gamma\delta$  T cells in  
 476 wild type pigs while no  $\gamma\delta$  T cells were detected in TRDC-Knockout pigs. **(B)** PBMC and  
 477 spleen cells were isolated and stained for CD2 and  $\gamma\delta$  T cell-specific CD3. Typically in wild  
 478 type pigs the majority (80%) of  $\gamma\delta$  T cells in the blood belong to the CD2 negative phenotype  
 479 (left dot blot), while in the spleen the majority (66%) of  $\gamma\delta$  T cells are CD2 positive (middle  
 480 dot blot). No  $\gamma\delta$  T cells of either type were detected in the spleen of TRDC-Knockout pigs.  
 481 **(C)** Most  $\gamma\delta$  T cells are CD4 and CD8 negative. Accordingly TRDC-Knockout pigs have  
 482 minimal numbers of CD4/CD8 double negative T cells. **(D)** The percentage of lymphocyte  
 483 subpopulations of all lymphocytes without  $\gamma\delta$  T cells were compared of wild type and TRDC-  
 484 Knockout pigs. No significant difference of any lymphocyte subpopulation was detected.

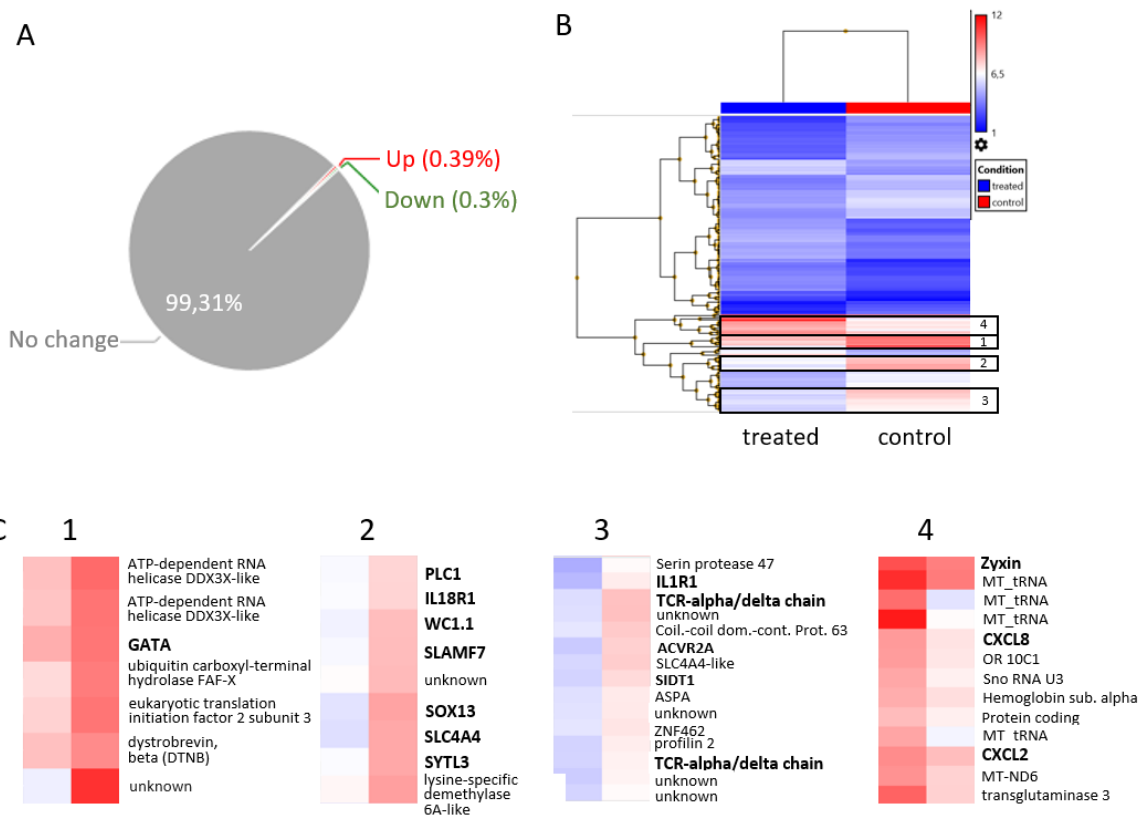

485

486

487 **Figure 7: Transcriptional changes in PBMC of TRDC-Knockout pig refelect the loss of**  
488  **$\gamma\delta$  T cells. (A)** Only 0.7 % of genes were regulated more than 2 fold in PBMC of TRDC-  
489 Knockout pigs. **(B)** Using hirachical clustering up-regulated and down-regulated genes were  
490 sorted acording to the expression levels. **(C)** down-regulated (1,2,3) and upregulated (4)  
491 genes from the hirachical clustering (B) were characterized in more detail. (1) all annotated  
492 genes of this cluster were expressed preferentially by T cells. GATA3 is highly expressed by  
493  $\gamma\delta$  T cells.  
494 (2) Cluster 2 contains genes like WC1.1 and SOX13 which are preferentially expressed by  $\gamma\delta$   
495 T cells to a various degree. (3) T cell receptor genes were found in cluster 3. In addition, IL-  
496 1R (3) and IL-18R (2) were downregulated in PBMC of TRDC-Knockout pigs. (4) Genes  
497 which were upregulated contain genes which were preferentially expressed by granulocytes  
498 and monocytes in human PBMC like Zyxin, CXCL8 and CXCL2.

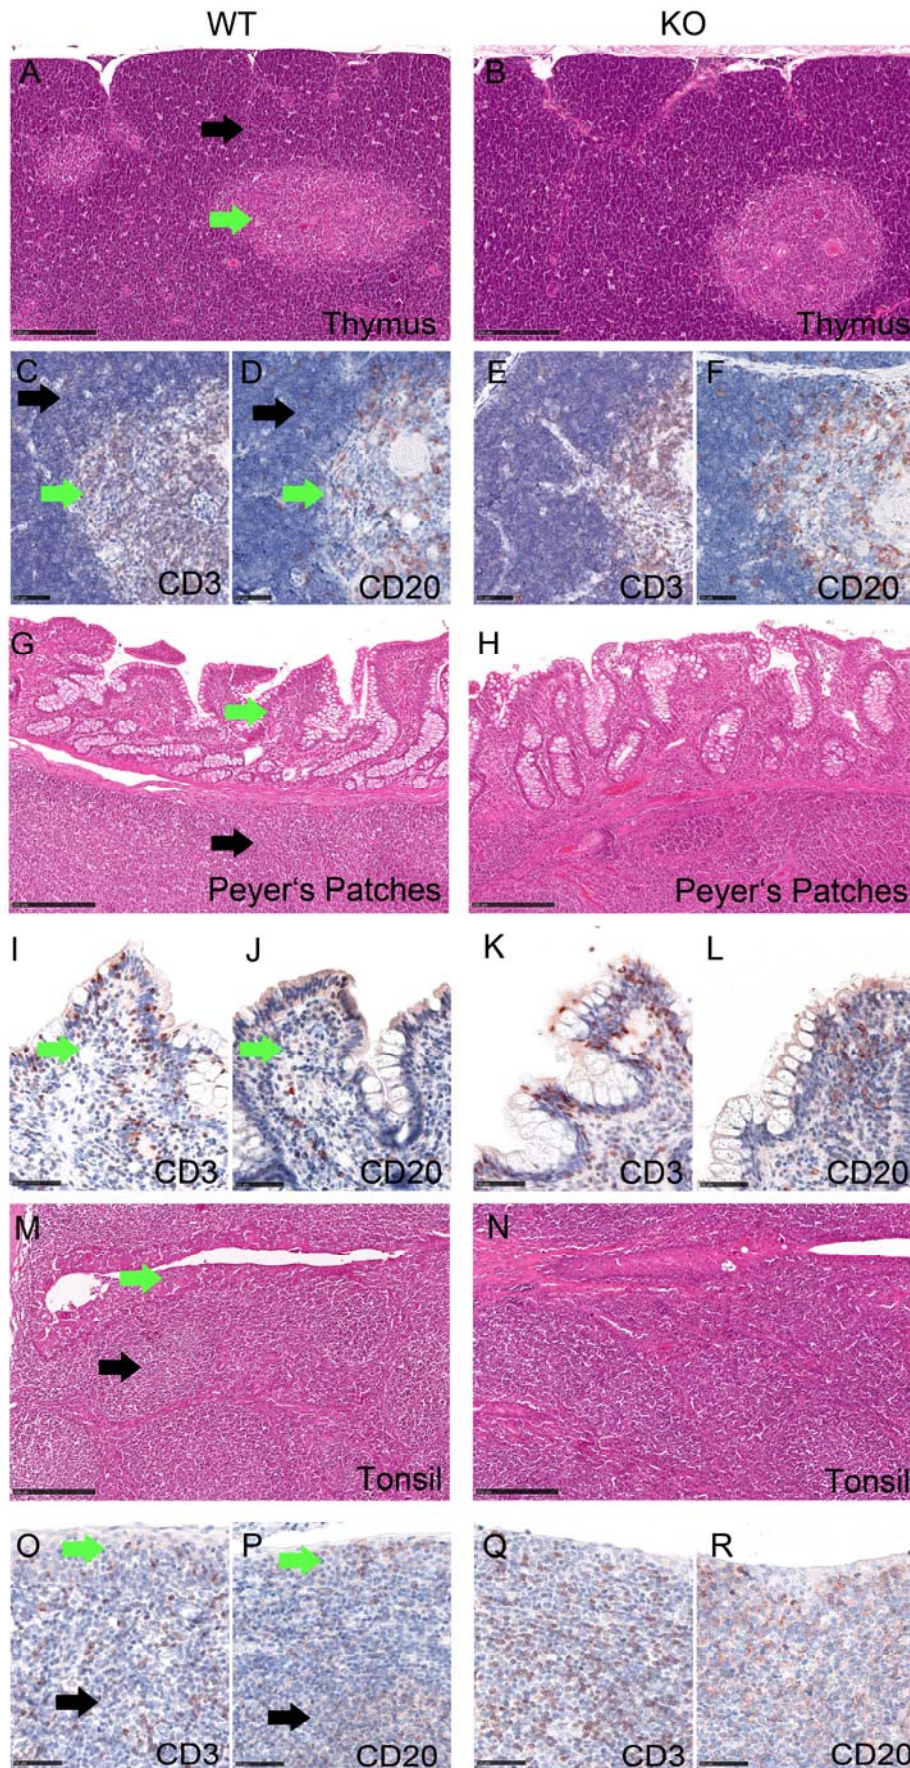

500 **Figure 8: No differences between wildtype and TRDC-Knockout pigs were detected by**  
501 **histological examination of lymphoid tissues.** Lymphoid tissues from wild type (WT: A, C,  
502 D, G, I, J, M, O, P) and knockout (KO: B, E, F, H, K, L, N, Q, R) domestic pigs. Thymus (A,  
503 B) with cortex (black arrow) and medulla (green arrow), Peyer's Patches (G, H) with mucosa  
504 associated lymphoid follicle (black arrow) and absorptive epithelium (green arrow) containing  
505 intraepithelial, and transmigrating lymphocytes, Tonsil (M, N) with mucosa associated  
506 lymphoid follicle (black arrow) and mucosal epithelium (green arrow) containing intraepithelial  
507 and transmigrating lymphocytes. H&E stain (A, B, G, H, M, N), immunohistochemistry (C-F, I-  
508 L, O-R), using anti-CD3 or anti-CD20 antibody as indicated, ABC method, AEC chromogen

509

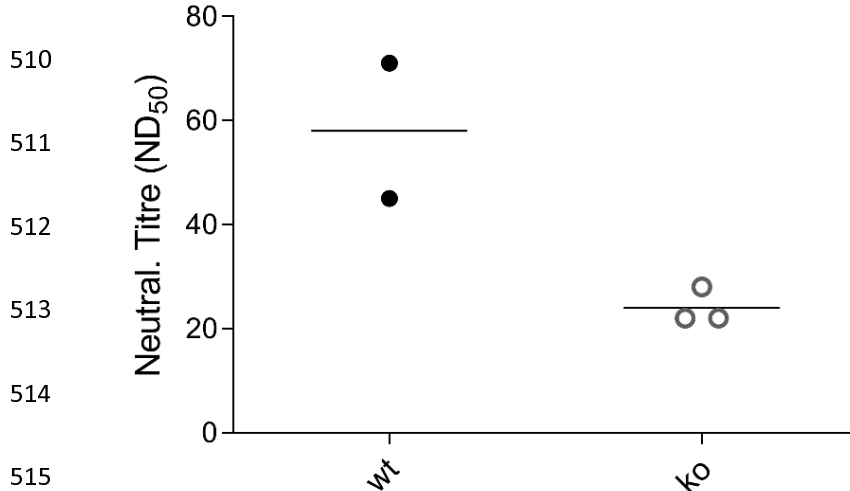

516

517 **Figure 9:** Diagram showing the titers of virus-neutralizing serum antibodies of 2 syngenic wt  
518 (wt) and 3 TRDC-Knockout (ko) pigs at day 21 post vaccination, given as the maximal  
519 reciprocal dilution of the sera that is able to neutralize 50% of 100 TCID<sub>50</sub> infective doses of  
520 CSFV C-strain calculated according to Spaerman-Kaerber. The mean values for both groups  
521 are shown as horizontal lines. The P value determined by statistical analysis is 0.0428.

## 522 References

523 1 Hirano, M. *et al.* Evolutionary implications of a third lymphocyte lineage in lampreys. *Nature*  
524 **501**, 435-438, doi:10.1038/nature12467 (2013).



- 525 2 Lawand, M., Dechanet-Merville, J. & Dieu-Nosjean, M. C. Key Features of Gamma-Delta T-Cell  
526 Subsets in Human Diseases and Their Immunotherapeutic Implications. *Frontiers in*  
527 *immunology* **8**, 761, doi:10.3389/fimmu.2017.00761 (2017).
- 528 3 Deroost, K. & Langhorne, J. Gamma/Delta T Cells and Their Role in Protection Against  
529 Malaria. *Frontiers in immunology* **9**, 2973, doi:10.3389/fimmu.2018.02973 (2018).
- 530 4 Vantourout, P. & Hayday, A. Six-of-the-best: unique contributions of gammadelta T cells to  
531 immunology. *Nature reviews. Immunology* **13**, 88-100, doi:10.1038/nri3384 (2013).
- 532 5 Hanninen, A. & Harrison, L. C. Mucosal tolerance to prevent type 1 diabetes: can the  
533 outcome be improved in humans? *Rev Diabet Stud* **1**, 113-121, doi:10.1900/RDS.2004.1.113  
534 (2004).
- 535 6 Jameson, J. *et al.* A role for skin gammadelta T cells in wound repair. *Science* **296**, 747-749,  
536 doi:10.1126/science.1069639 (2002).
- 537 7 Born, W. *et al.* Immunoregulatory functions of gamma delta T cells. *Adv Immunol* **71**, 77-144  
538 (1999).
- 539 8 Hayday, A. C. [gamma][delta] cells: a right time and a right place for a conserved third way of  
540 protection. *Annual review of immunology* **18**, 975-1026,  
541 doi:10.1146/annurev.immunol.18.1.975 (2000).
- 542 9 Bukowski, J. F., Morita, C. T. & Brenner, M. B. Recognition and destruction of virus-infected  
543 cells by human gamma delta CTL. *J Immunol* **153**, 5133-5140 (1994).
- 544 10 Johnson, R. M. *et al.* A murine CD4-, CD8- T cell receptor-gamma delta T lymphocyte clone  
545 specific for herpes simplex virus glycoprotein I. *J Immunol* **148**, 983-988 (1992).
- 546 11 Welsh, R. M. *et al.* Alpha beta and gamma delta T-cell networks and their roles in natural  
547 resistance to viral infections. *Immunological reviews* **159**, 79-93, doi:10.1111/j.1600-  
548 065x.1997.tb01008.x (1997).
- 549 12 Han, H. J. *et al.* Murine gammadelta T Cells Render B Cells Refractory to Commitment of IgA  
550 Isotype Switching. *Immune Netw* **18**, e25, doi:10.4110/in.2018.18.e25 (2018).
- 551 13 Castro, C. D., Boughter, C. T., Broughton, A. E., Ramesh, A. & Adams, E. J. Diversity in  
552 recognition and function of human gammadelta T cells. *Immunological reviews* **298**, 134-152,  
553 doi:10.1111/imr.12930 (2020).
- 554 14 Fichtner, A. S. *et al.* Alpaca (*Vicugna pacos*), the first nonprimate species with a  
555 phosphoantigen-reactive Vgamma9Vdelta2 T cell subset. *Proceedings of the National*  
556 *Academy of Sciences of the United States of America* **117**, 6697-6707,  
557 doi:10.1073/pnas.1909474117 (2020).
- 558 15 Holderness, J., Hedges, J. F., Ramstead, A. & Jutila, M. A. Comparative biology of gammadelta  
559 T cell function in humans, mice, and domestic animals. *Annual review of animal biosciences*  
560 **1**, 99-124, doi:10.1146/annurev-animal-031412-103639 (2013).
- 561 16 Herzig, C. T., Waters, R. W., Baldwin, C. L. & Telfer, J. C. Evolution of the CD163 family and its  
562 relationship to the bovine gamma delta T cell co-receptor WC1. *BMC evolutionary biology* **10**,  
563 181, doi:10.1186/1471-2148-10-181 (2010).
- 564 17 Hsu, H. *et al.* WC1 is a hybrid gammadelta TCR coreceptor and pattern recognition receptor  
565 for pathogenic bacteria. *J Immunol* **194**, 2280-2288, doi:10.4049/jimmunol.1402021 (2015).
- 566 18 Dong, X. N. & Chen, Y. H. Marker vaccine strategies and candidate CSFV marker vaccines.  
567 *Vaccine* **25**, 205-230, doi:10.1016/j.vaccine.2006.07.033 (2007).
- 568 19 Leifer, I. *et al.* Characterization of C-strain "Riems" TAV-epitope escape variants obtained  
569 through selective antibody pressure in cell culture. *Veterinary research* **43**, 33,  
570 doi:10.1186/1297-9716-43-33 (2012).
- 571 20 Lin, T. T. C. L., R.C.T. *An overall report on the development of a highly safe and potent*  
572 *lapinized hog cholera virus strain for hog cholera control in Taiwan* 40-42 (National Science  
573 Council, 1981).
- 574 21 van Oirschot, J. T. Vaccinology of classical swine fever: from lab to field. *Veterinary*  
575 *microbiology* **96**, 367-384, doi:10.1016/j.vetmic.2003.09.008 (2003).

- 576 22 Itohara, S. *et al.* T cell receptor delta gene mutant mice: independent generation of alpha  
577 beta T cells and programmed rearrangements of gamma delta TCR genes. *Cell* **72**, 337-348  
578 (1993).
- 579 23 Sell, S. *et al.* Control of murine cytomegalovirus infection by gammadelta T cells. *PLoS*  
580 *pathogens* **11**, e1004481, doi:10.1371/journal.ppat.1004481 (2015).
- 581 24 McKenna, K. C. *et al.* gammadelta T cells are a component of early immunity against  
582 preerythrocytic malaria parasites. *Infection and immunity* **68**, 2224-2230,  
583 doi:10.1128/iai.68.4.2224-2230.2000 (2000).
- 584 25 Omar, T., Ziltener, P., Chamberlain, E., Cheng, Z. & Johnston, B. Mice Lacking gammadelta T  
585 Cells Exhibit Impaired Clearance of *Pseudomonas aeruginosa* Lung Infection and Excessive  
586 Production of Inflammatory Cytokines. *Infection and immunity* **88**, doi:10.1128/IAI.00171-20  
587 (2020).
- 588 26 Kurome, M. *et al.* Factors influencing the efficiency of generating genetically engineered pigs  
589 by nuclear transfer: multi-factorial analysis of a large data set. *BMC Biotechnol* **13**, 43,  
590 doi:10.1186/1472-6750-13-43 (2013).
- 591 27 Liu, Y. *et al.* Developmental Competence and Epigenetic Profile of Porcine Embryos Produced  
592 by Two Different Cloning Methods. *Cell Reprogram* **19**, 171-179, doi:10.1089/cell.2016.0055  
593 (2017).
- 594 28 Schmidt, M., Winther, K. D., Secher, J. O. & Callesen, H. Postmortem findings in cloned and  
595 transgenic piglets dead before weaning. *Theriogenology* **84**, 1014-1023,  
596 doi:10.1016/j.theriogenology.2015.05.037 (2015).
- 597 29 Tanihara, F. *et al.* Effects of concentration of CRISPR/Cas9 components on genetic mosaicism  
598 in cytoplasmic microinjected porcine embryos. *J Reprod Dev* **65**, 209-214,  
599 doi:10.1262/jrd.2018-116 (2019).
- 600 30 Huhr, J. *et al.* Impaired T-cell responses in domestic pigs and wild boar upon infection with a  
601 highly virulent African swine fever virus strain. *Transboundary and emerging diseases* **67**,  
602 3016-3032, doi:10.1111/tbed.13678 (2020).
- 603 31 Post, J., Weesendorp, E., Montoya, M. & Loeffen, W. L. Influence of Age and Dose of African  
604 Swine Fever Virus Infections on Clinical Outcome and Blood Parameters in Pigs. *Viral*  
605 *Immunol* **30**, 58-69, doi:10.1089/vim.2016.0121 (2017).
- 606 32 Takamatsu, H. H. *et al.* Porcine gammadelta T cells: possible roles on the innate and adaptive  
607 immune responses following virus infection. *Veterinary immunology and immunopathology*  
608 **112**, 49-61, doi:10.1016/j.vetimm.2006.03.011 (2006).
- 609 33 Toka, F. N. & Golde, W. T. Cell mediated innate responses of cattle and swine are diverse  
610 during foot-and-mouth disease virus (FMDV) infection: a unique landscape of innate  
611 immunity. *Immunology letters* **152**, 135-143, doi:10.1016/j.imlet.2013.05.007 (2013).
- 612 34 Lee, J., Choi, K., Olin, M. R., Cho, S. N. & Molitor, T. W. Gammadelta T cells in immunity  
613 induced by *Mycobacterium bovis* bacillus Calmette-Guerin vaccination. *Infection and*  
614 *immunity* **72**, 1504-1511, doi:10.1128/iai.72.3.1504-1511.2004 (2004).
- 615 35 Olin, M. R. *et al.* Gammadelta lymphocyte response to porcine reproductive and respiratory  
616 syndrome virus. *Viral Immunol* **18**, 490-499, doi:10.1089/vim.2005.18.490 (2005).
- 617 36 Kick, A. R. *et al.* The T-Cell Response to Type 2 Porcine Reproductive and Respiratory  
618 Syndrome Virus (PRRSV). *Viruses* **11**, doi:10.3390/v11090796 (2019).
- 619 37 Schwaiger, T. *et al.* Experimental H1N1pdm09 infection in pigs mimics human seasonal  
620 influenza infections. *PloS one* **14**, e0222943, doi:10.1371/journal.pone.0222943 (2019).
- 621 38 Cong, L. *et al.* Multiplex genome engineering using CRISPR/Cas systems. *Science* **339**, 819-  
622 823, doi:10.1126/science.1231143 (2013).
- 623 39 Lucas-Hahn, A. *et al.* 122 A New Maturation Medium Improves Porcine Embryo Production *In*  
624 *Vitro* %J Reproduction, Fertility and Development. **30**, 200-201,  
625 doi:https://doi.org/10.1071/RDv30n1Ab122 (2018).
- 626 40 Holker, M. *et al.* Duration of in vitro maturation of recipient oocytes affects blastocyst  
627 development of cloned porcine embryos. *Cloning Stem Cells* **7**, 35-44,  
628 doi:10.1089/clo.2005.7.35 (2005).

- 629 41 Meyers, G., Saalmuller, A. & Buttner, M. Mutations abrogating the RNase activity in  
630 glycoprotein E(rns) of the pestivirus classical swine fever virus lead to virus attenuation.  
631 *Journal of virology* **73**, 10224-10235, doi:10.1128/JVI.73.12.10224-10235.1999 (1999).  
632 42 von Freyburg, M., Ege, A., Saalmuller, A. & Meyers, G. Comparison of the effects of RNase-  
633 negative and wild-type classical swine fever virus on peripheral blood cells of infected pigs. *J*  
634 *Gen Virol* **85**, 1899-1908, doi:10.1099/vir.0.79988-0 (2004).

635

636

637

638 **Table 1: Results of the intracytoplasmic microinjection of CRISPR/Cas9 targeting exon**  
 639 **4 of the porcine TRDC locus in porcine zygotes.**

| Recipient       | Microinjected plasmids             | Number of transferred embryos | Pregnant*             | Born piglets             | No. of TRDC-KO          |
|-----------------|------------------------------------|-------------------------------|-----------------------|--------------------------|-------------------------|
| #695            | pX330-TRDCEX4#1,<br>pX330TRDCEX4#2 | 35                            | +                     | 5                        | 2                       |
| #696            | pX330-TRDCEX4#1,<br>pX330TRDCEX4#2 | 35                            | +                     | 9                        | 4                       |
| <b>Total: 2</b> |                                    | <b>70</b>                     | <b>2/2<br/>(100%)</b> | <b>14<br/>(eff. 20%)</b> | <b>6/14<br/>(42.9%)</b> |

640 \*Pregnancy was detected on day 25

641 **Table 2: Results from somatic cell nuclear transfer employing genetically modified**  
 642 **cells as donor cells.**

| Recipient       | Cell clone* | Number of transferred embryos | Pregnant          | Born piglets (stillborn)            | No. of TRDC-KO of liveborn |
|-----------------|-------------|-------------------------------|-------------------|-------------------------------------|----------------------------|
| #8106           | H2          | 90                            | +                 | 2 (2)                               | n.d.                       |
| #738            | H2          | 90                            | +                 | 3 (1)                               | 2/2                        |
| #8115           | D12         | 97                            | +                 | 3 (3)                               | n.d.                       |
| #737            | D12         | 96                            | +                 | 9 (2)                               | 4/7                        |
| <b>Total: 4</b> |             | <b>373 (avg. 93.3)</b>        | <b>4/4 (100%)</b> | <b>17 (cloning efficiency 4.6%)</b> | <b>6/9 (66.7%)</b>         |

643 \* cell clone D12: mixed population of knockout and wild type cells, cell clone H2: pure  
 644 knockout cells.

645
